# Supplementary material for: Monomeric and aggregation emissions of tetraphenylethene in a photo-switchable polymer controlled by cyclization of diarylethene and solvent conditions
Source: Royal Society of Chemistry journal article supplement (doi:10.1039/c7tc03071a), 2017-01-01
Supplement: c7tc03071a1.pdf [file c7tc03071a1.pdf]

## Supporting Information

# **Monomeric and aggregation emissions of tetraphenylethene in a photo-switchable polymer controlled by cyclization of diarylethene and solvent conditions**

Ravinder Singh,<sup>a</sup> Hsin-Yen Wu,<sup>a</sup> Atul Kumar Dwivedi,<sup>a</sup> Ashutosh Singh,<sup>a</sup> Chien-Min Lin,<sup>a</sup> Putikam  
Raghunath,<sup>b</sup> Ming-Chang Lin,<sup>b</sup> Tung-Kung Wu,<sup>c</sup> Kung-Hwa Wei<sup>a</sup> and Hong-Cheu Lin<sup>\*a</sup>

<sup>a</sup> Department of Materials Science & Engineering, National Chiao Tung University, Hsinchu, Taiwan.

<sup>b</sup> Center for Interdisciplinary Molecular Science, Department of Applied Chemistry, National Chiao  
Tung University, Hsinchu 300, Taiwan.

<sup>c</sup> Department of Biological Science & Technology, National Chiao Tung University, Hsinchu, Taiwan.

\*E-mail: [linhc@mail.nctu.edu.tw](mailto:linhc@mail.nctu.edu.tw)

## List of contents:

|                                                              |       |              |
|--------------------------------------------------------------|-------|--------------|
| 1. Figs. S1 & S2                                             | ----- | page S3      |
| 2. Figs. S3 & S4                                             | ----- | page S4      |
| 3. Figs. S5 & S6                                             | ----- | page S5      |
| 4. Figs. S7 & S8                                             | ----- | page S6      |
| 5. Figs. S9 & S10 (Table)                                    | ----- | page S7-S8   |
| 6. Figs. S11-S13                                             | ----- | page S9-S10  |
| 7. NMR ( $^1\text{H}$ & $^{13}\text{C}$ ) (Figs. S14 to S21) | ----- | page S11-S17 |
| 8. HRMS (ESI data) (Fig. S22)                                | ----- | page S18     |
| 9. HRMS (ESI data) (Fig. S23)                                | ----- | page S19     |
| 10. HRMS (ESI data) (Fig. S24)                               | ----- | page S20     |
| 11. HRMS (ESI data) (Fig. S25)                               | ----- | page S21     |
| 12. HPLC data (Figs. S26 & S27)                              | ----- | page S22     |
| 13. GPC data (Fig. S28)                                      | ----- | page S23     |

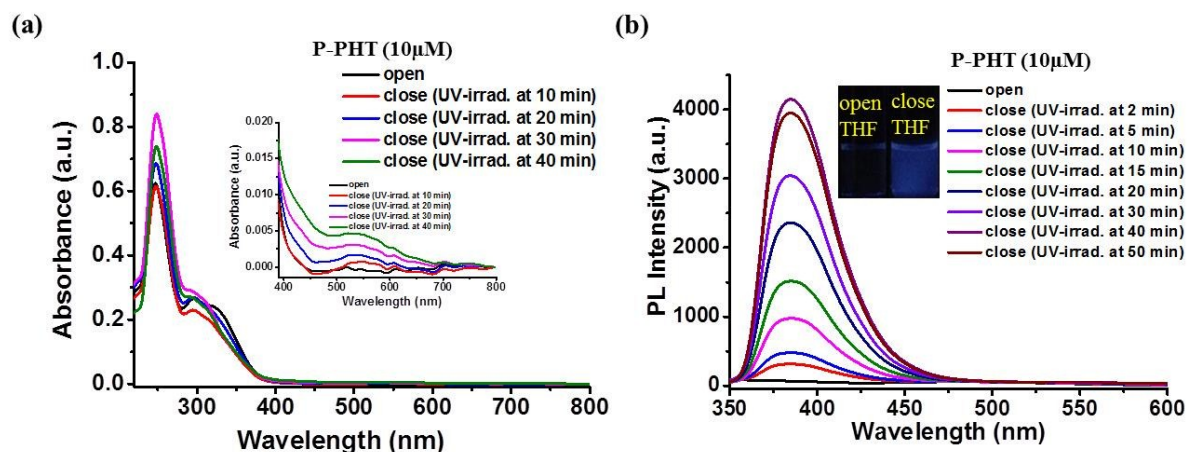

**Fig. S1** P-PHT in THF before and after UV-irradiation, (a) UV-Vis spectral changes of P-PHT (open to close). (b) PL spectral changes of P-PHT (open to close). Inset: Photoimages of P-PHT 0 min and 40 min. ( $\lambda_{\text{ex}} = 320$  nm for PL exp.)

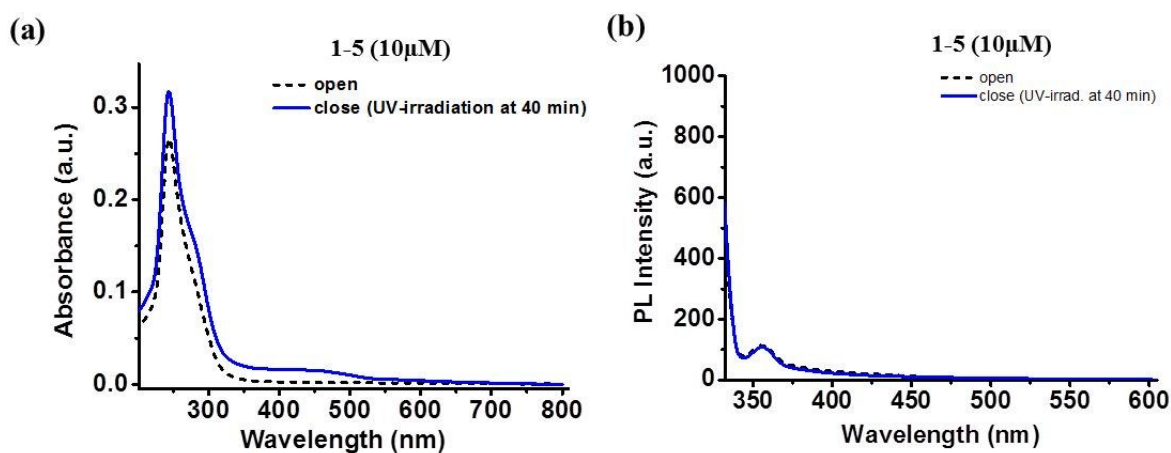

**Fig. S2** Compound 1-5 in THF before and after UV-irradiation, (a) UV-Vis spectral changes of compound 1-5 (open to close). (b) PL spectral changes of compound 1-5 (open to close). ( $\lambda_{\text{ex}} = 320$  nm for PL exp.)

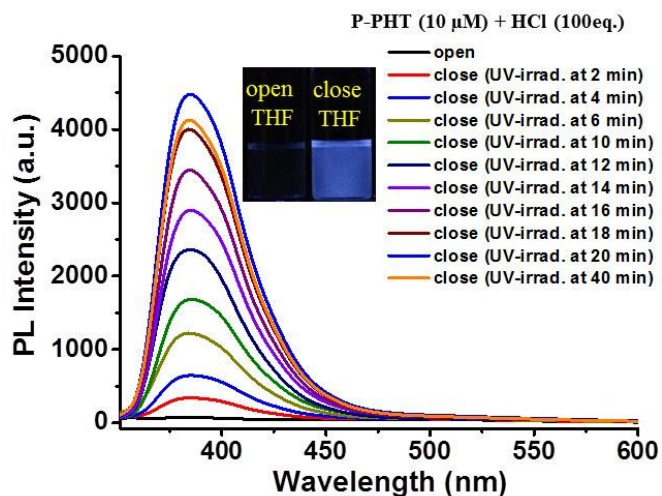

**Fig. S3** PL spectral changes of **P-PHT** (open to close form) with **HCL** (100 eq.) before and after UV-irradiation. Inset: Photoimages of **P-PHT** at 0 and 20 min with **HCl** (100eq.). ( $\lambda_{\text{ex}} = 320$  nm for PL exp.)

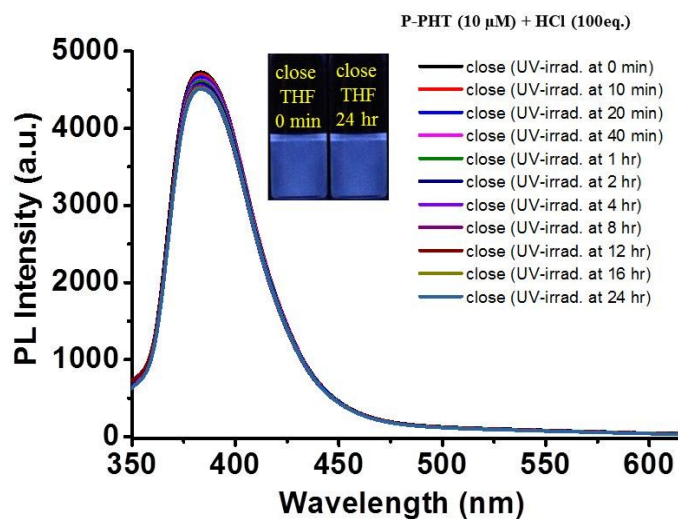

**Fig. S4** PL spectral changes of **P-PHT** (close) under acidic condition (**HCl** 100 eq. in **THF**) at different time intervals (from 0 to 24 hr). Inset: Photoimages of **P-PHT**(close) at 0 min and 24 hr. ( $\lambda_{\text{ex}} = 320$  nm for PL exp.)

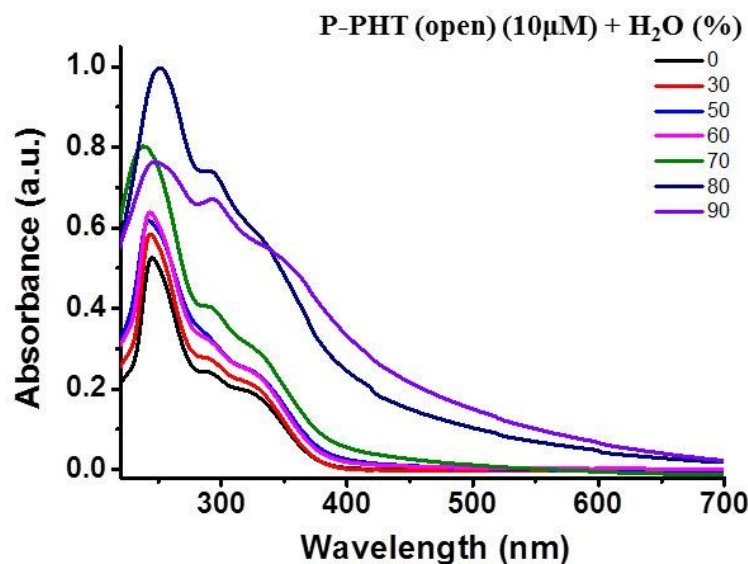

**Fig. S5** UV-Vis spectral changes of **P-PHT** (open) in THF by increasing water contents.

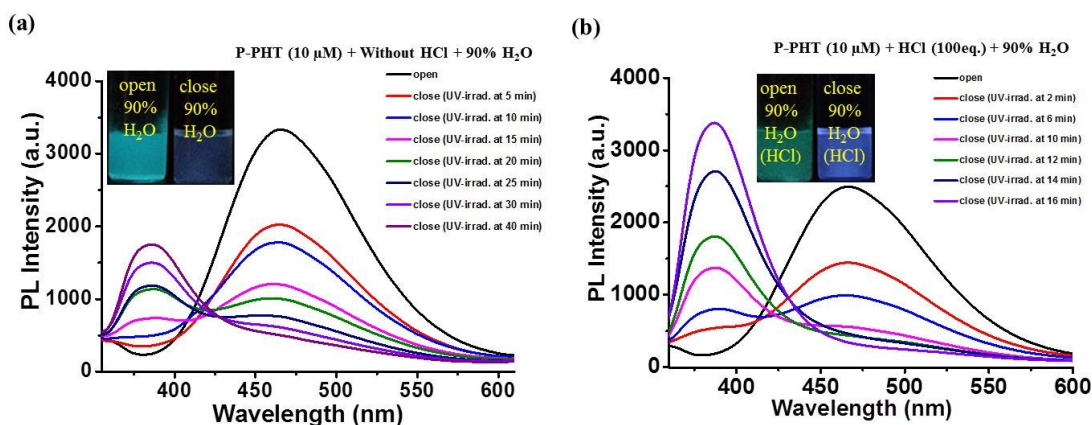

**Fig. S6** **P-PHT** at 90% water content before and after UV-irradiation (at  $\lambda = 346$  nm), (a) and (b) PL spectral changes of **P-PHT** (90% H<sub>2</sub>O) from open to close form upon UV-irradiation without and with HCl (100eq.), respectively. Insets: Photoimages of **P-PHT** (90% H<sub>2</sub>O) at 0, 40 min (UV-irradiation) without HCl, and at 0, 20 min (UV-irradiation) with HCl, respectively. ( $\lambda_{\text{ex}} = 320$  nm for PL exp.)

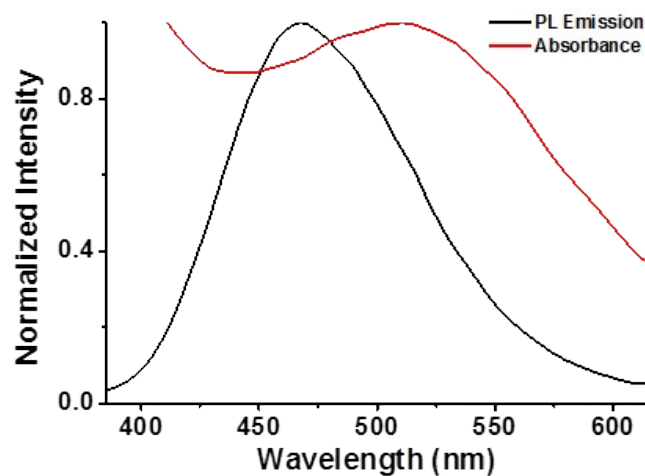

**Fig. S7** Spectral overlaps between AIE emission of TPE and absorption of cyclized DAE unit in **P-PHT**.

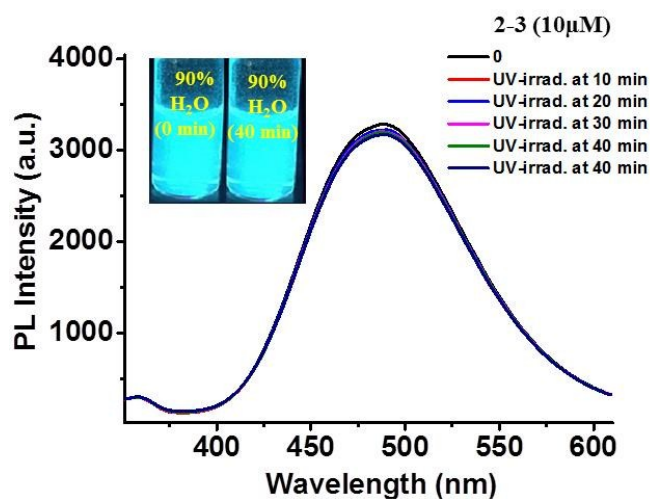

**Fig. S8** PL spectral changes of compound **2-3** at 90% water content after UV-irradiation (40 min and  $\lambda = 346$  nm). Insets: Photoimages of compound **2-3** (90%  $\text{H}_2\text{O}$ ) at 0 min and 40 min (UV-irradiation). ( $\lambda_{\text{exc}} = 320$  nm for PL exp.)

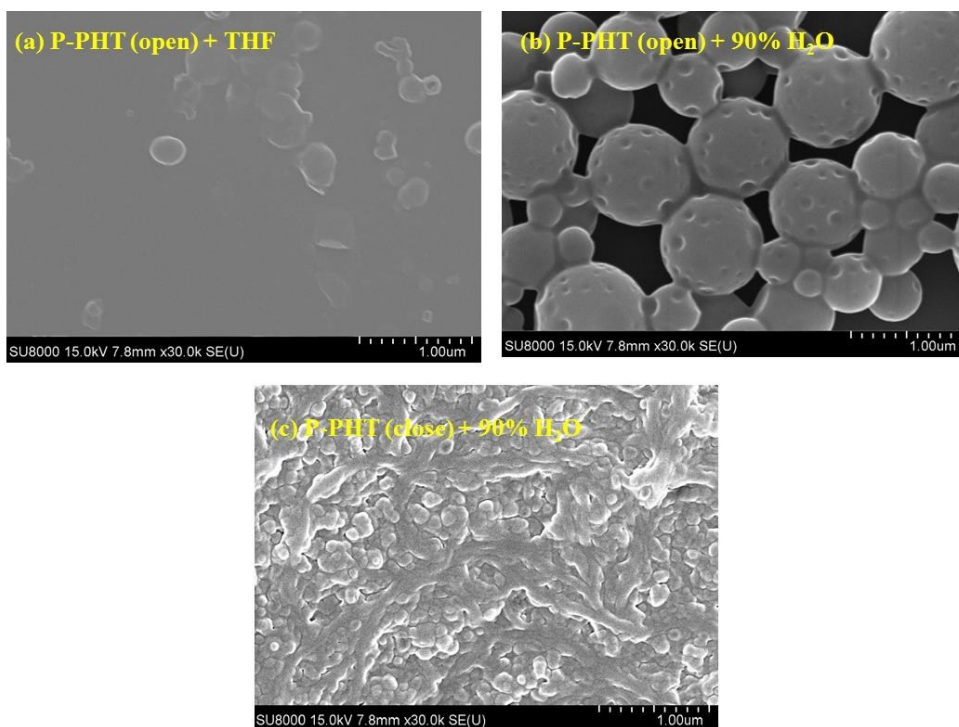

**Fig. S9** Morphological images of (a) **P-PHT** (open) in THF (b) **P-PHT** (open) at 90% water content. Upon the UV-Irradiation, (c) **P-PHT** (close) at 90% water content.

| <b>P-<br/>PHT</b>     | <b>Absorption data</b>   |                                    |                |                                  |                                  |
|-----------------------|--------------------------|------------------------------------|----------------|----------------------------------|----------------------------------|
|                       | <b>Excited<br/>State</b> | $\lambda_{\text{abs,cal}}$<br>(nm) | $f^{\text{a}}$ | <b>Configuration<sup>b</sup></b> | <b>Weight<sup>c</sup></b><br>(%) |
| <b>open<br/>form</b>  | S1                       | 350.7                              | 0.47           | H $\rightarrow$ L                | 99.3                             |
|                       | S4                       | 286.5                              | 0.12           | H-1 $\rightarrow$ L+1            | 96.7                             |
| <b>close<br/>form</b> | S1                       | 478.7                              | 0.20           | H $\rightarrow$ L                | 99.5                             |
|                       | S4                       | 350.2                              | 0.48           | H-1 $\rightarrow$ L+1            | 96.7                             |
|                       | S12                      | 284.2                              | 0.12           | H-1 $\rightarrow$ L+4            | 86.2                             |

**Fig. (Table) S10** Absorption and Fluorescence maxima, Oscillator strengths, Contributing transitions of open and close forms of **P-PHT** are calculated by B3LYP/6-31G(d) method. (<sup>a</sup> Oscillator strength), (<sup>b</sup> H and L represent the calculated HOMO and LUMO, respectively; The second highest occupied and lowest unoccupied molecular orbitals denoted as H-1 and L+1, respectively), (<sup>c</sup> Only configurations with 5% or greater contribution are included.).



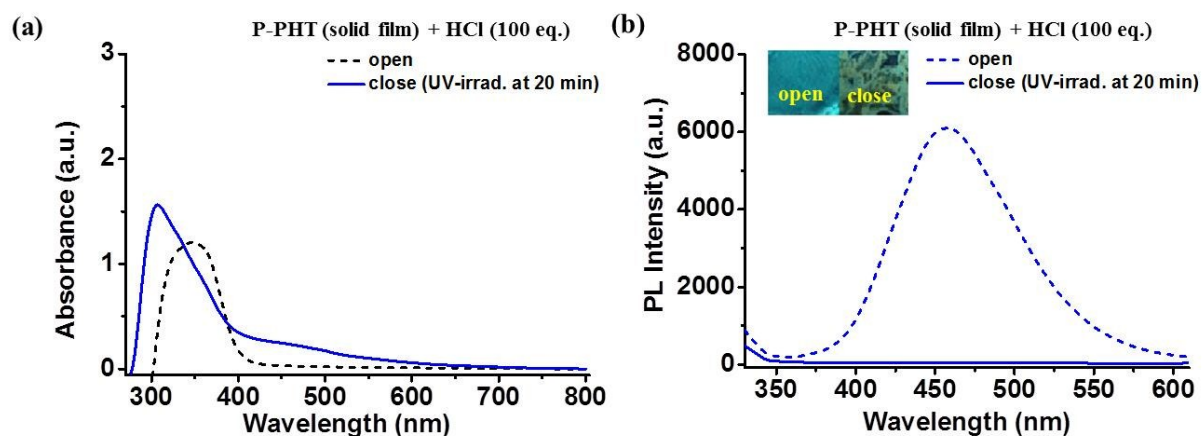

**Fig. S11** P-PHT in solid films before and after UV-irradiation under HCL (100 eq.), (a) UV-Vis spectral changes of **P-PHT** (open to close). (b) PL spectral changes of **P-PHT** (open to close). Inset: Photoimages of **P-PHT** at 0 min and 20 min. ( $\lambda_{\text{exc}} = 320$  nm for PL exp.)

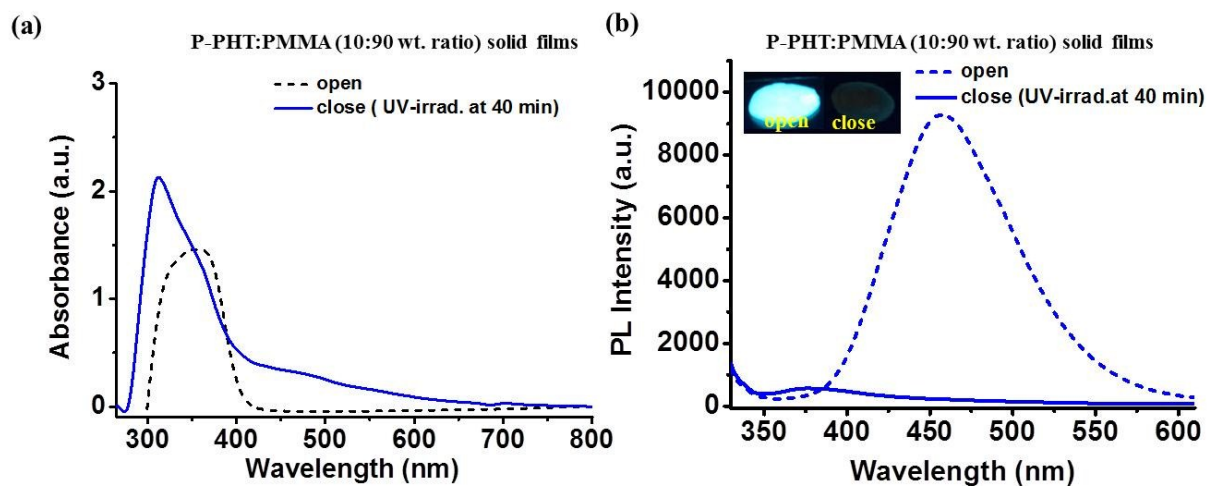

**Fig. S12** **P-PHT:PMMA** (10:90 wt. ratio) in solid films before and after UV-irradiation, (a) UV-Vis spectral changes of **P-PHT:PMMA** (10:90 wt. ratio) (open to close). (b) PL spectral changes of **P-PHT:PMMA** (10:90 wt. ratio) (open to close). Inset: Photoimages of **P-PHT:PMMA** (10:90 wt. ratio) at 0 min and 40 min. ( $\lambda_{\text{ex}} = 320$  nm for PL exp.)

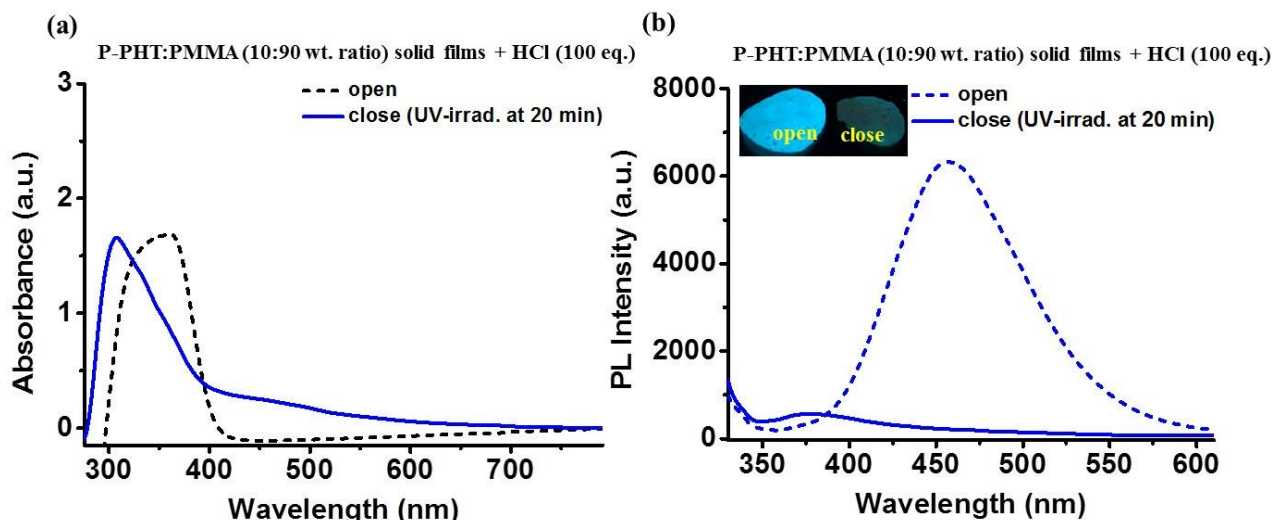

**Fig. S13** **P-PHT:PMMA** (10:90 wt. ratio) in solid films before and after UV-irradiation with HCl (100 eq.), (a) UV-Vis spectral changes of **P-PHT:PMMA** (10:90 wt. ratio) (open to close). (b) PL spectral changes of **P-PHT:PMMA** (10:90 wt. ratio) (open to close). Inset: Photoimages of **P-PHT:PMMA** (10:90 wt. ratio) at 0 min and 20 min. ( $\lambda_{\text{ex}} = 320$  nm for PL exp.)

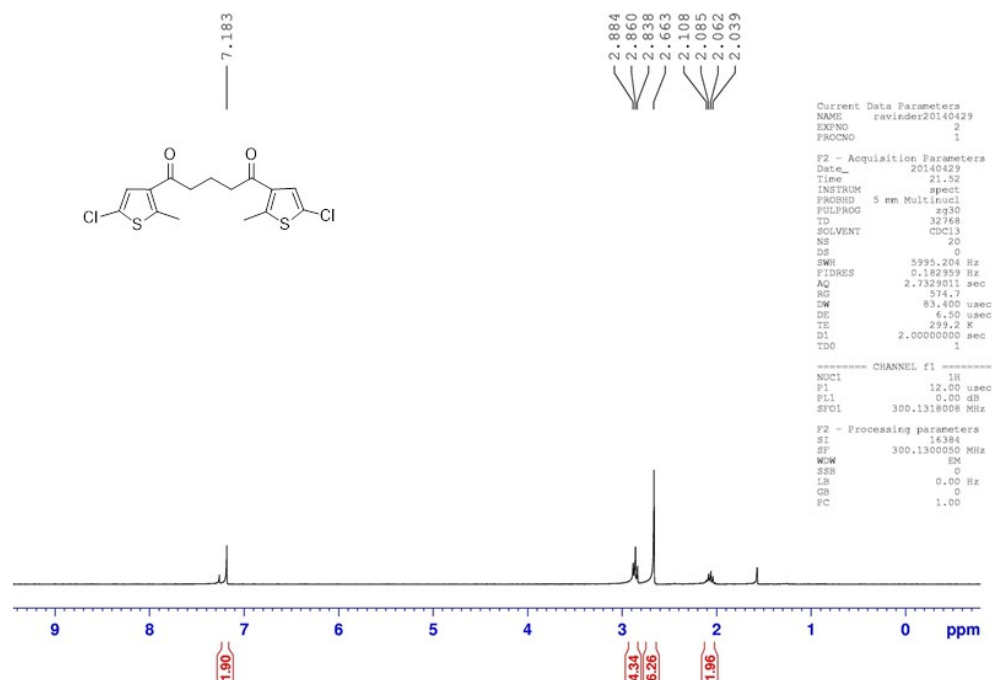

Fig. S14 <sup>1</sup>H-NMR of intermediate 1-1.

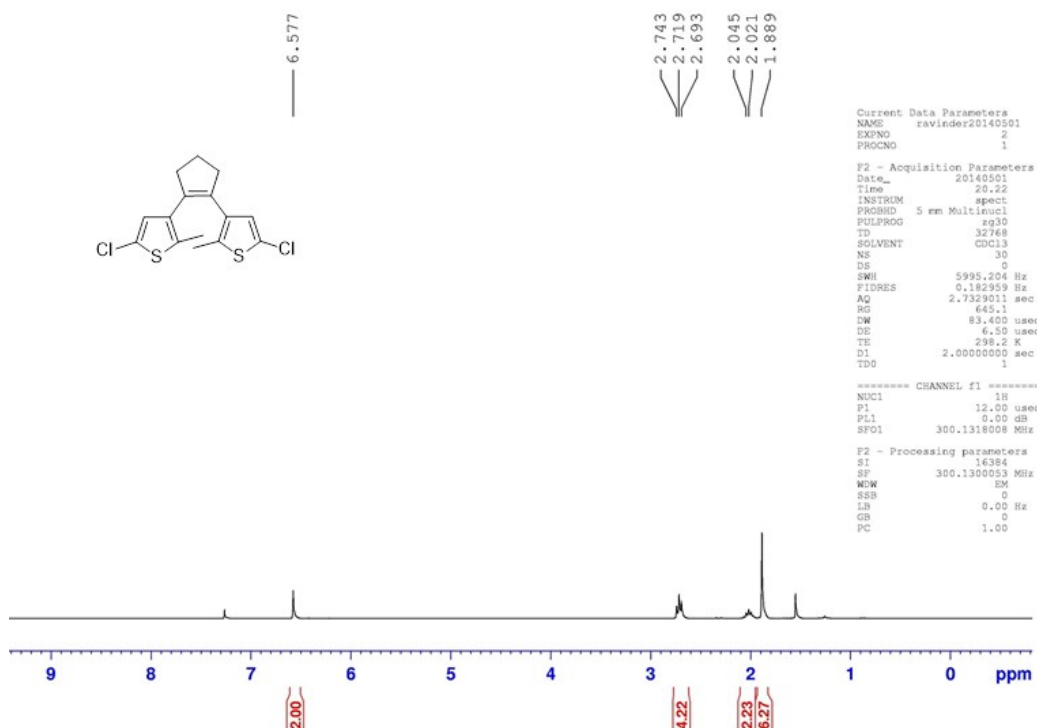

Fig. S15 <sup>1</sup>H-NMR of intermediate 1-2.

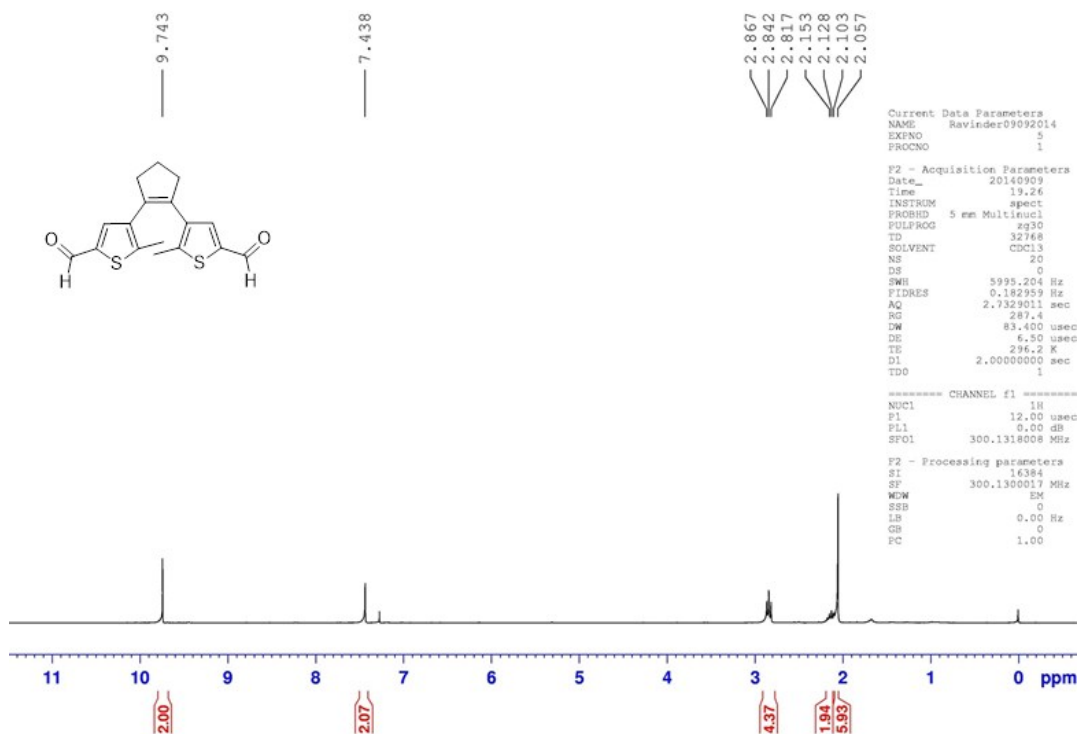

Fig. S16.1 <sup>1</sup>H-NMR of intermediate 1-3.

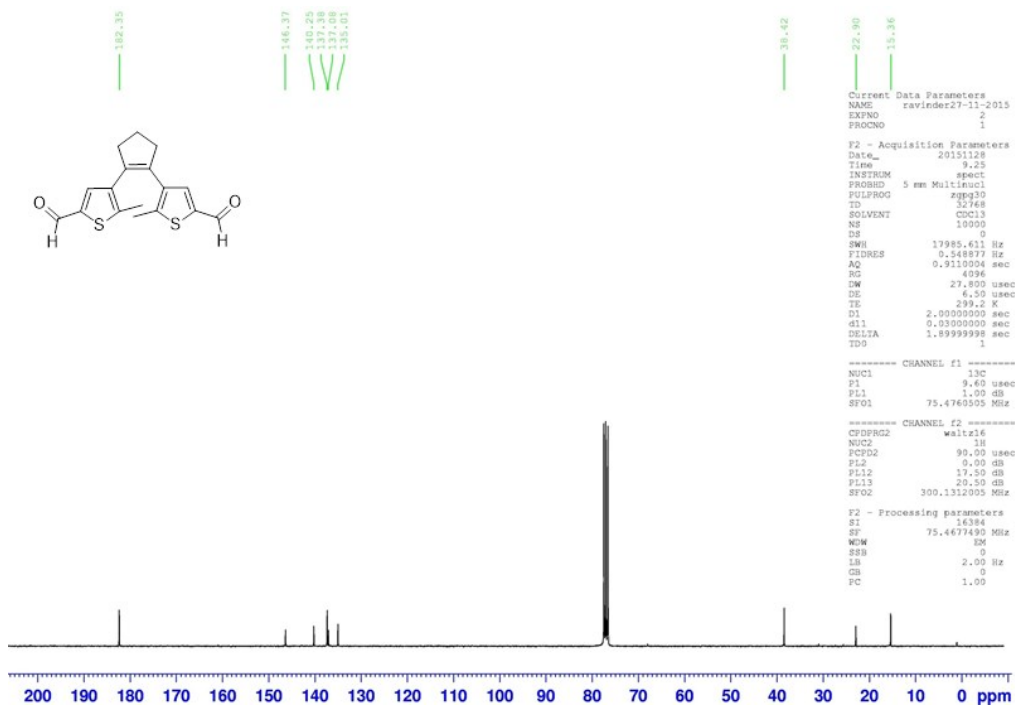

Fig. S16.2 <sup>13</sup>C-NMR of Intermediate 1-3.

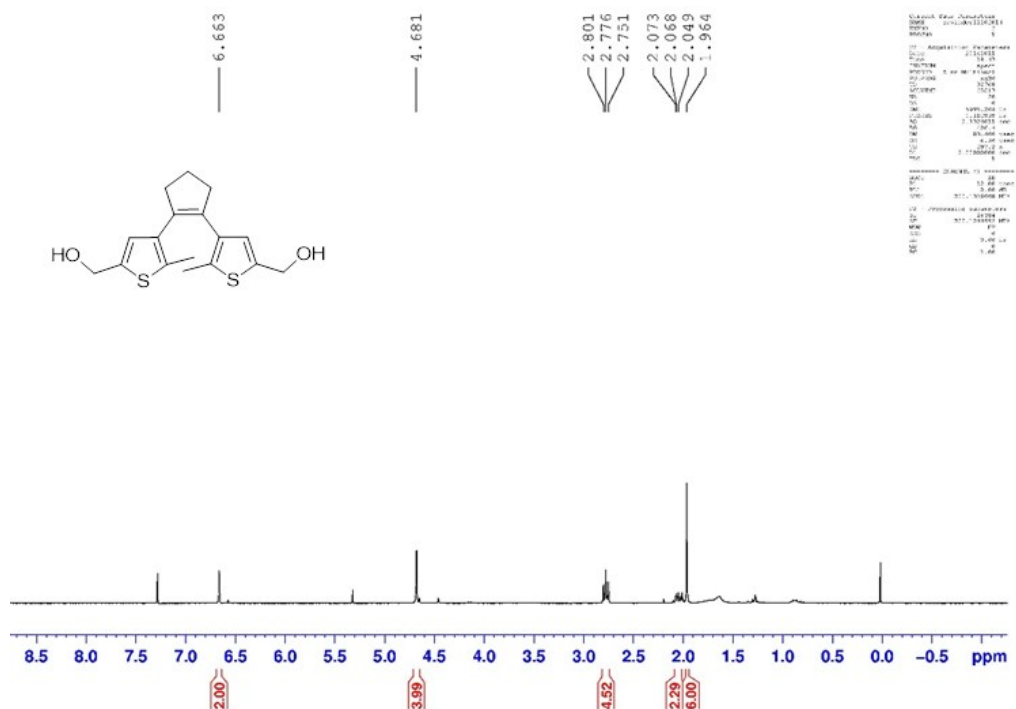

Fig. S17.1 <sup>1</sup>H-NMR of intermediate 1-4.

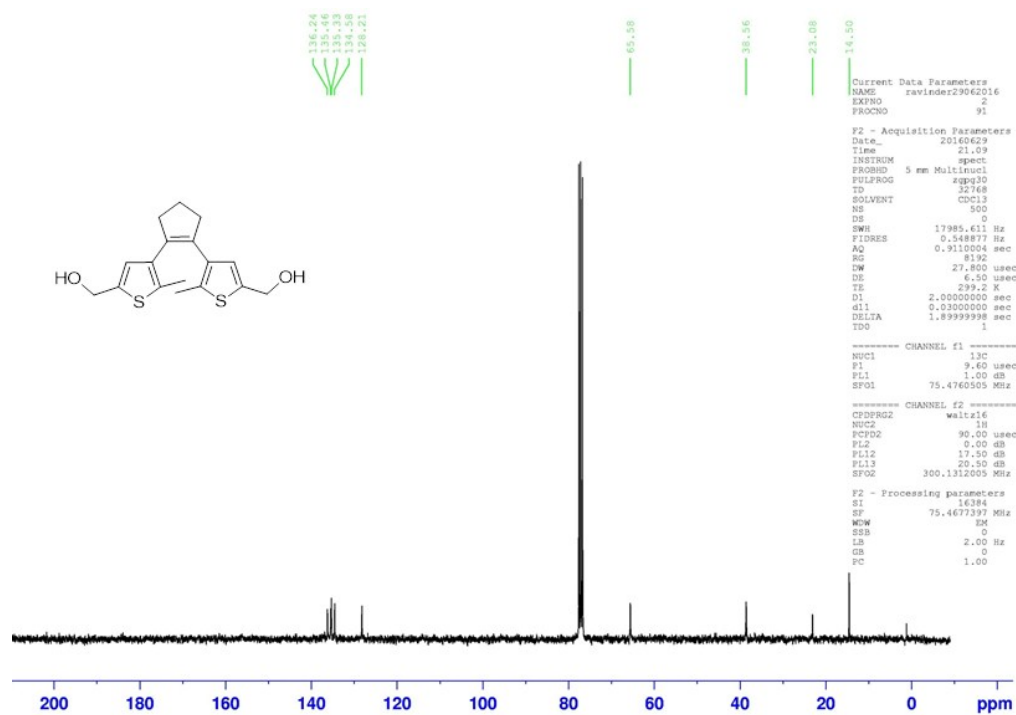

Fig. S17.2 <sup>13</sup>C-NMR of intermediate 1-4.

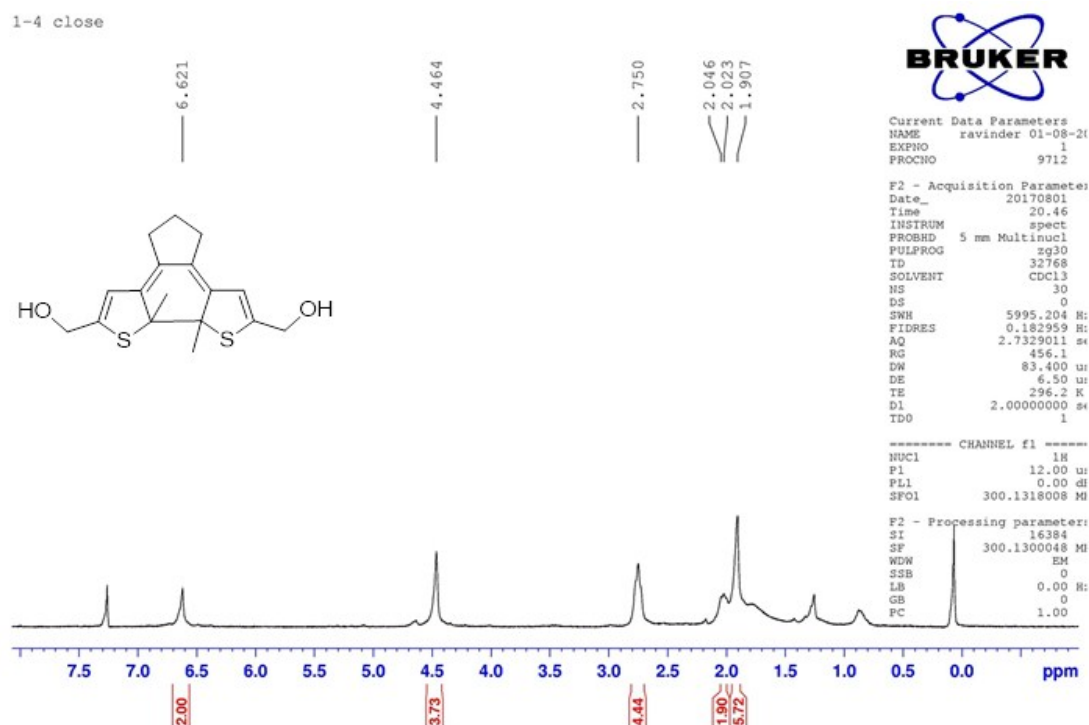

Fig. S18 <sup>1</sup>H-NMR of intermediate 1-4 (close).

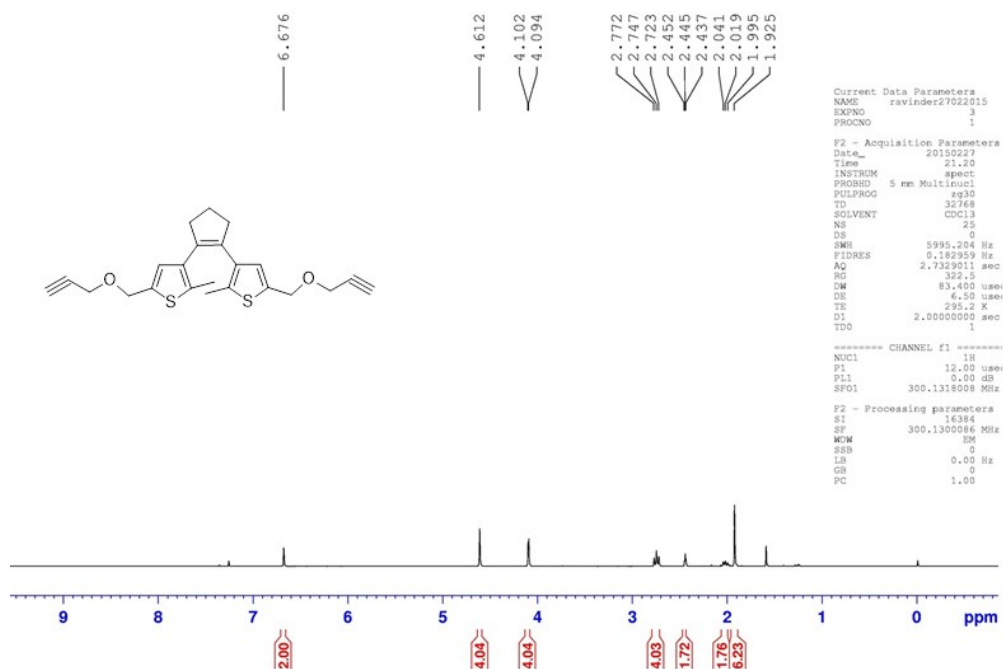

Fig. S19.1 <sup>1</sup>H-NMR of intermediate 1-5.

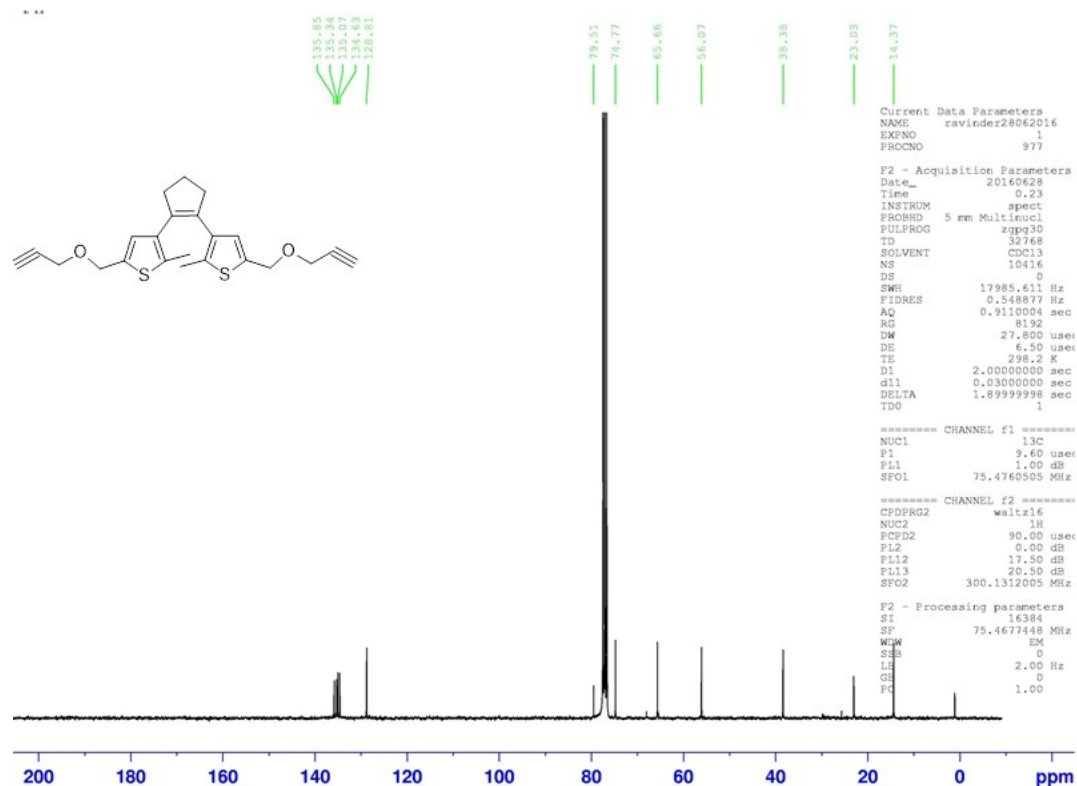

Fig. S19.2 <sup>13</sup>C-NMR of intermediate 1-5.

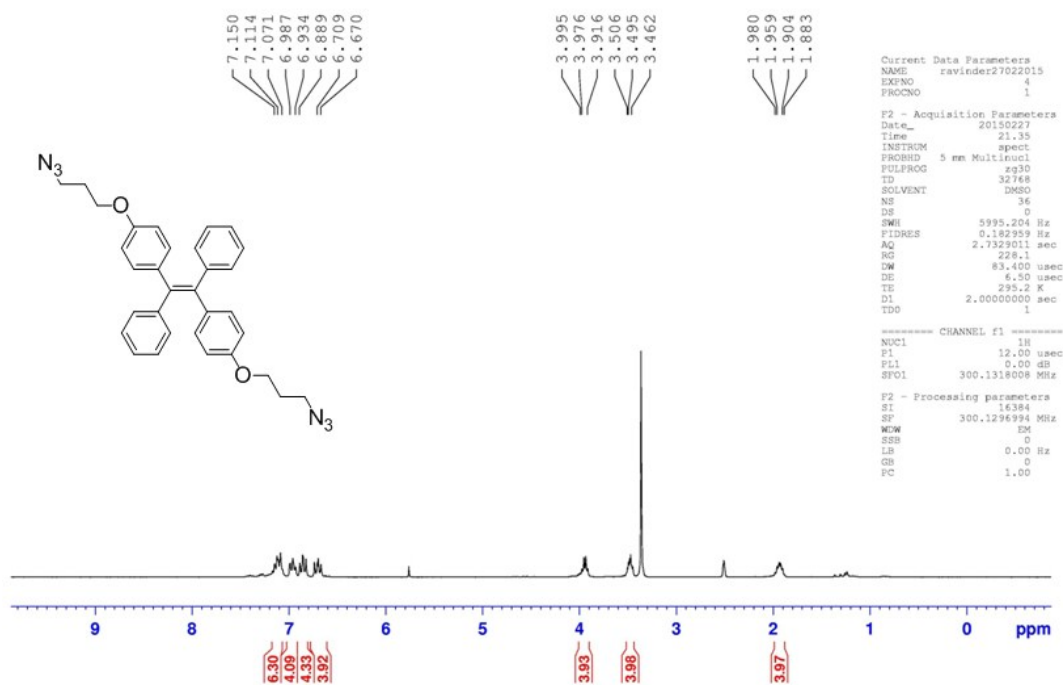

Fig. S20.1 <sup>1</sup>H-NMR of intermediate 2-3.

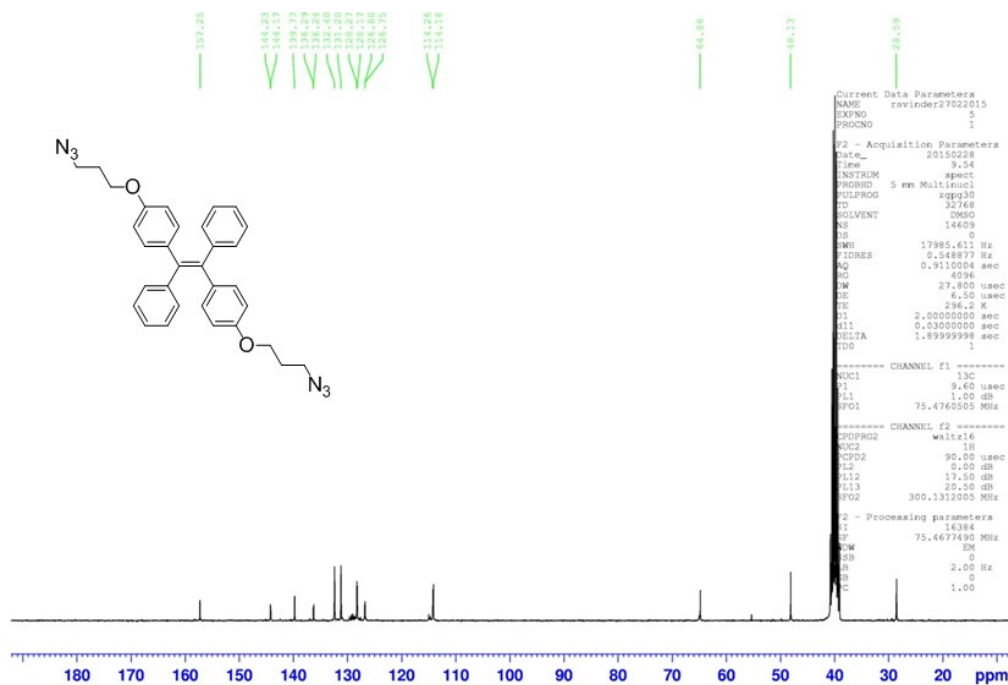

Fig. S20.2 <sup>13</sup>C-NMR of intermediate 2-3.

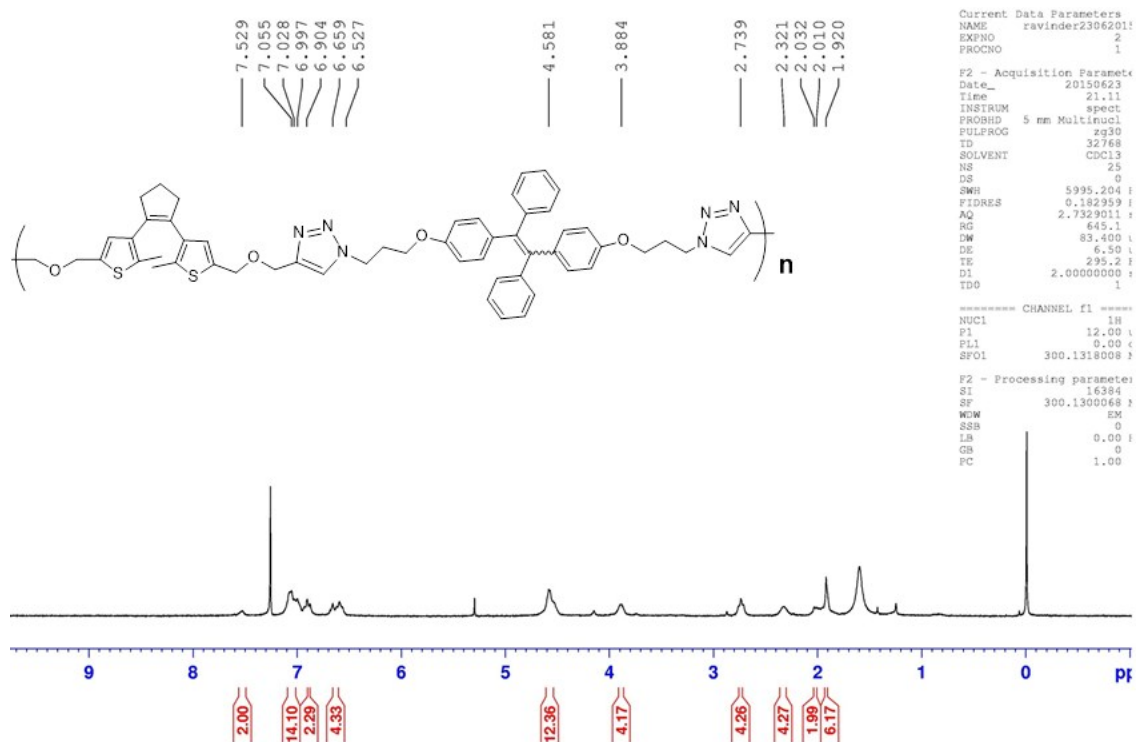

Fig. S21.1 <sup>1</sup>H-NMR of P-PHT.



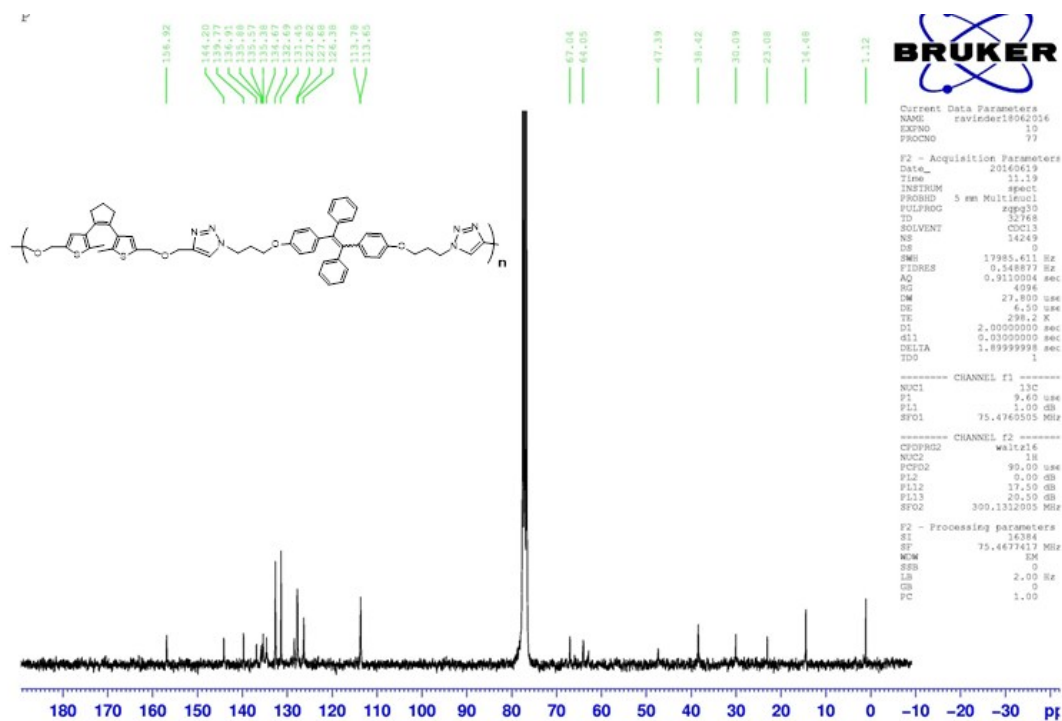

Fig. S21.2  $^{13}\text{C}$ -NMR of P-PHT.

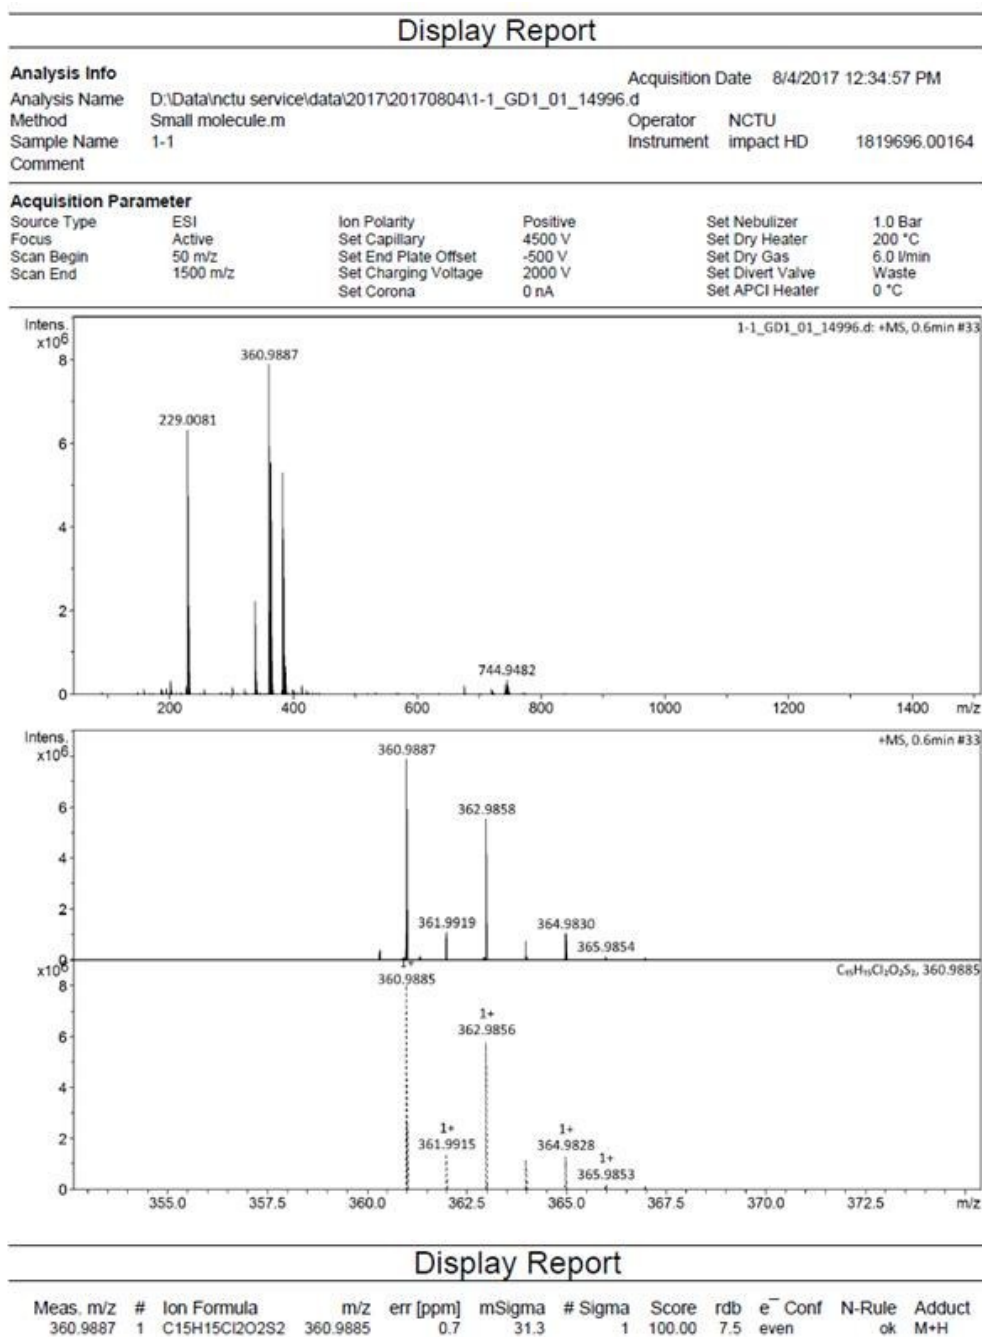

**Fig. S22** HRMS (ESI) data of intermediate **1-1**.

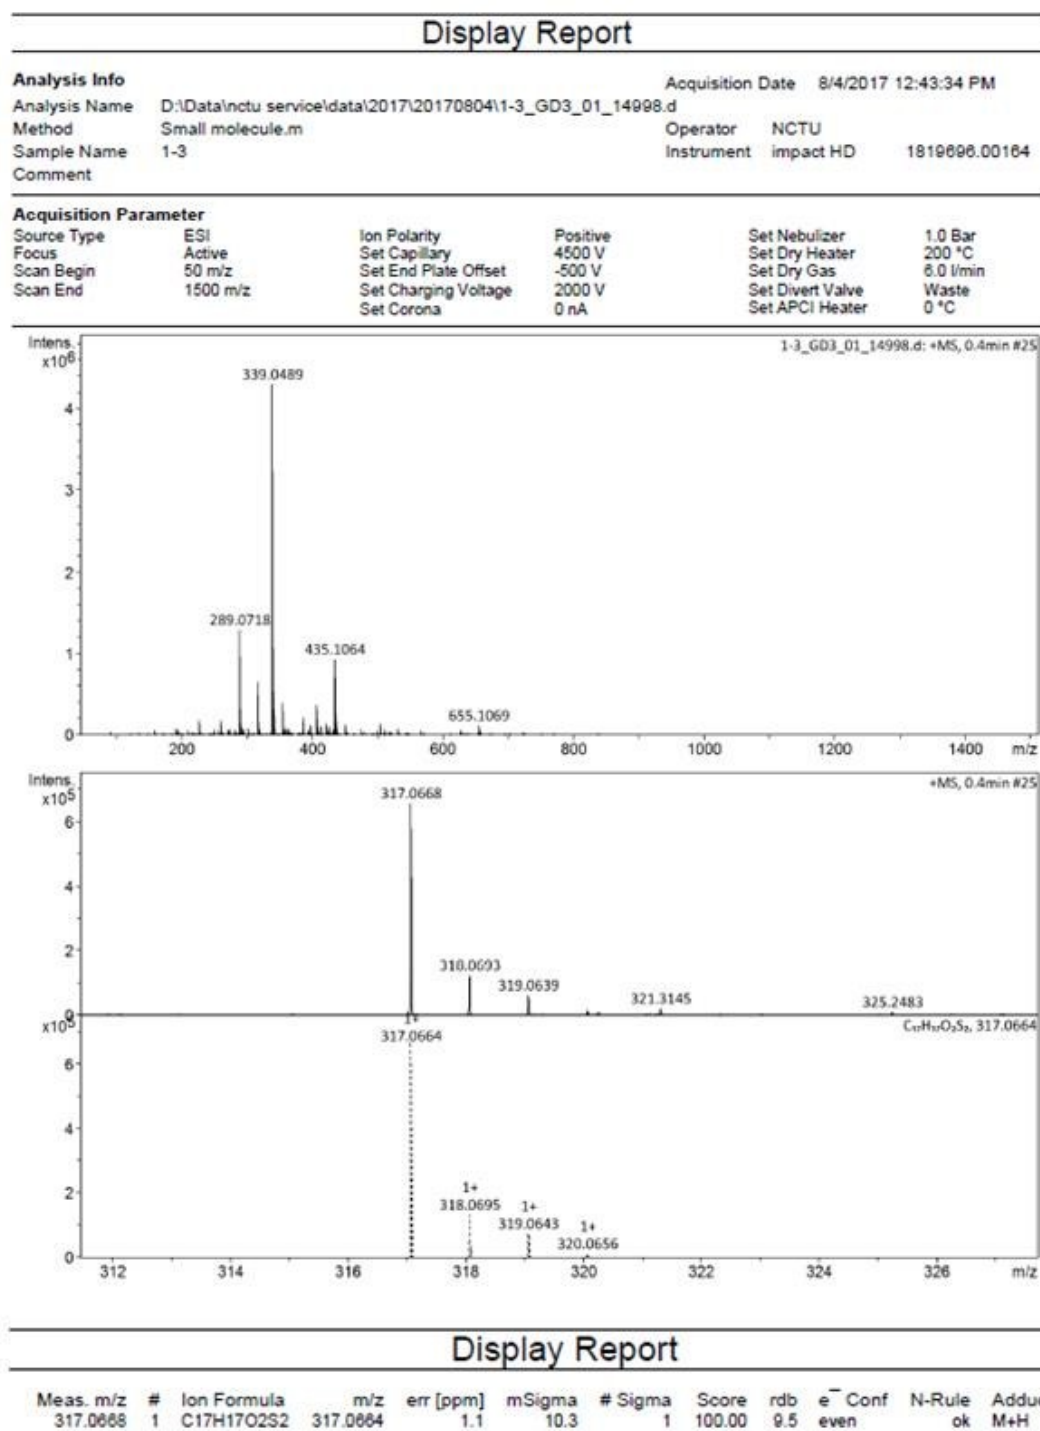

**Fig. S23** HRMS (ESI) data of intermediate **1-3**.

## Display Report

### Analysis Info

|               |                                                                       |
|---------------|-----------------------------------------------------------------------|
| Analysis Name | D:\Data\inctu service\data\2015\20151106\TPE-di-N3 ESI+_GA8_01_7912.d |
| Method        | Small molecule.m                                                      |
| Sample Name   | TPE-di-N3 ESI+                                                        |
| Comment       |                                                                       |

Acquisition Date 11/6/2015 2:16:21 PM

Operator NCTU

Instrument impact HD 1819696.00164

### Acquisition Parameter

|             |          |                      |           |
|-------------|----------|----------------------|-----------|
| Source Type | ESI      | Ion Polarity         | Positive  |
| Focus       | Active   | Set Capillary        | 4500 V    |
| Scan Begin  | 50 m/z   | Set End Plate Offset | -500 V    |
| Scan End    | 1500 m/z | Set Charging Voltage | 2000 V    |
|             |          | Set Corona           | 0 nA      |
|             |          | Set Nebulizer        | 1.0 Bar   |
|             |          | Set Dry Heater       | 200 °C    |
|             |          | Set Dry Gas          | 6.0 l/min |
|             |          | Set Divert Valve     | Waste     |
|             |          | Set APCI Heater      | 0 °C      |

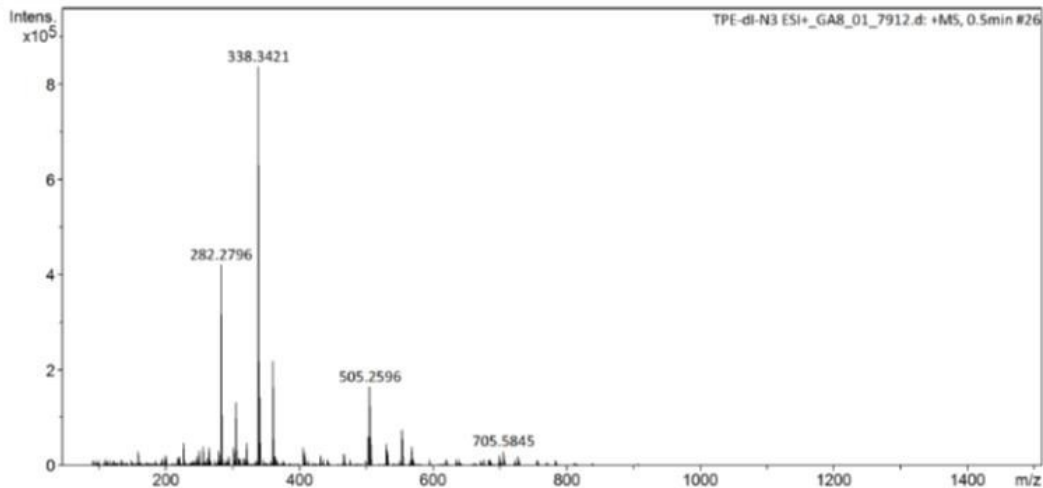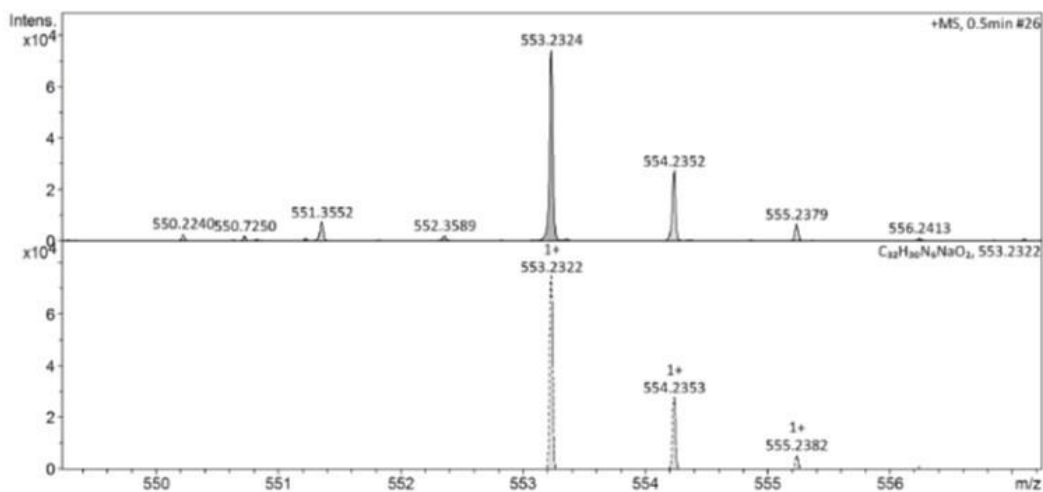

## Display Report

| Meas. m/z | # | Ion Formula  | m/z      | err [ppm] | mSigma | # Sigma | Score  | rdb  | e <sup>-</sup> Conf | N-Rule | Adduct |
|-----------|---|--------------|----------|-----------|--------|---------|--------|------|---------------------|--------|--------|
| 553.2324  | 1 | C32H30N6NaO2 | 553.2322 | 0.2       | 9.3    | 1       | 100.00 | 20.5 | even                | ok     | M+Na   |

**Fig. S24** HRMS (ESI) data of intermediate **2-3**.

## Display Report

### Analysis Info

|               |                                                                        |
|---------------|------------------------------------------------------------------------|
| Analysis Name | D:\Data\ncu service\data\2016\20160902\Intermediate 1-5_BA4_01_10899.d |
| Method        | Small molecule.m                                                       |
| Sample Name   | Intermediate 1-5                                                       |
| Comment       |                                                                        |

Acquisition Date 9/2/2016 10:23:48 AM

Operator NCTU

Instrument impact HD 1819696.00164

### Acquisition Parameter

|             |          |                      |           |
|-------------|----------|----------------------|-----------|
| Source Type | ESI      | Ion Polarity         | Positive  |
| Focus       | Active   | Set Capillary        | 4500 V    |
| Scan Begin  | 50 m/z   | Set End Plate Offset | -500 V    |
| Scan End    | 1500 m/z | Set Charging Voltage | 2000 V    |
|             |          | Set Corona           | 0 nA      |
|             |          | Set Nebulizer        | 1.0 Bar   |
|             |          | Set Dry Heater       | 200 °C    |
|             |          | Set Dry Gas          | 6.0 l/min |
|             |          | Set Divert Valve     | Waste     |
|             |          | Set APCI Heater      | 0 °C      |

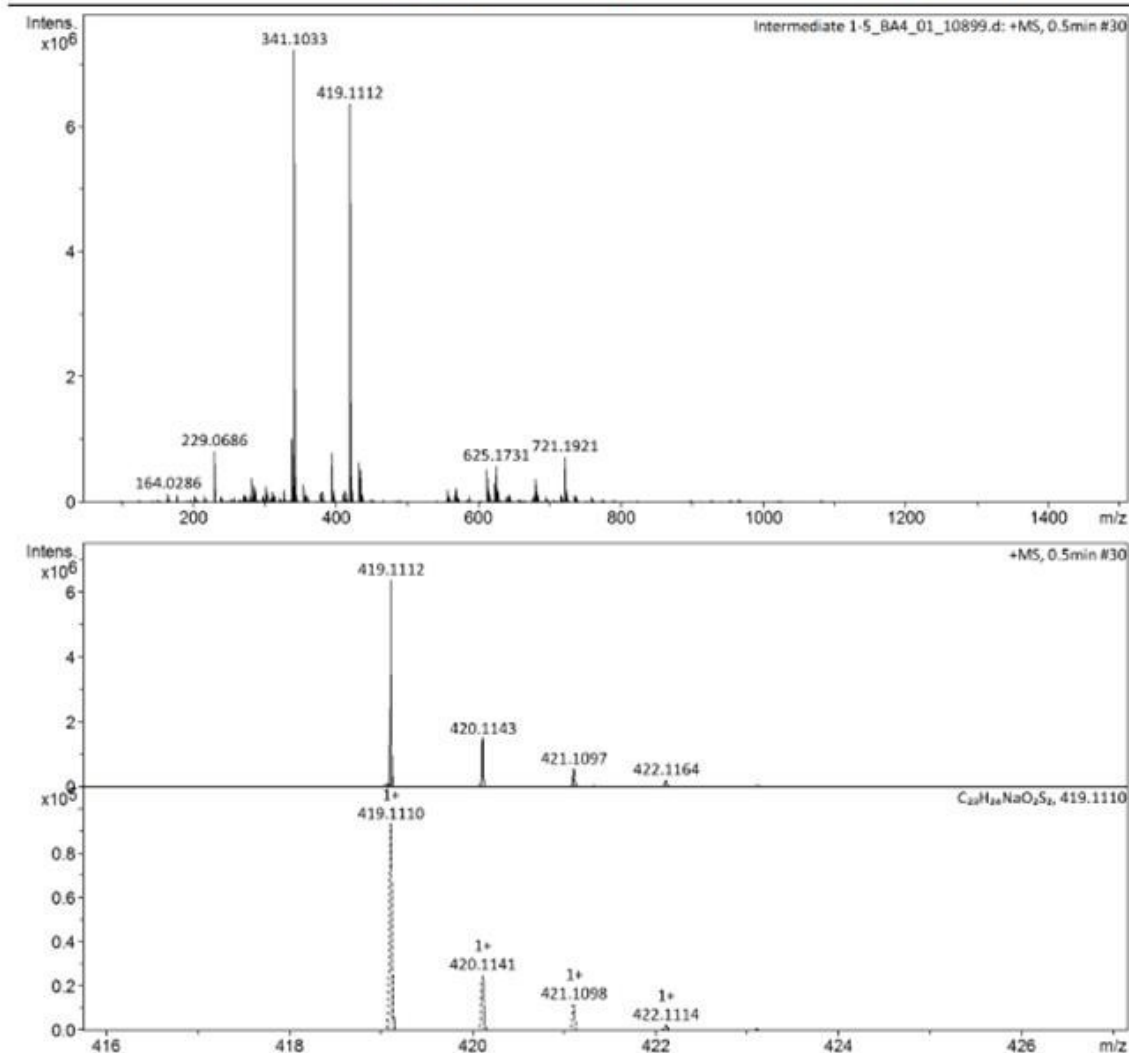

## Display Report

| Meas. m/z | # | Ion Formula                                                     | m/z      | err [ppm] | mSigma | # Sigma | Score  | rdb  | e <sup>-</sup> Conf | N-Rule | Adduct |
|-----------|---|-----------------------------------------------------------------|----------|-----------|--------|---------|--------|------|---------------------|--------|--------|
| 419.1112  | 1 | C <sub>23</sub> H <sub>24</sub> NaO <sub>2</sub> S <sub>2</sub> | 419.1110 | 0.5       | 24.5   | 1       | 100.00 | 11.5 | even                | ok     | M+Na   |

Fig. S25 HRMS (ESI) data of intermediate 1-5.

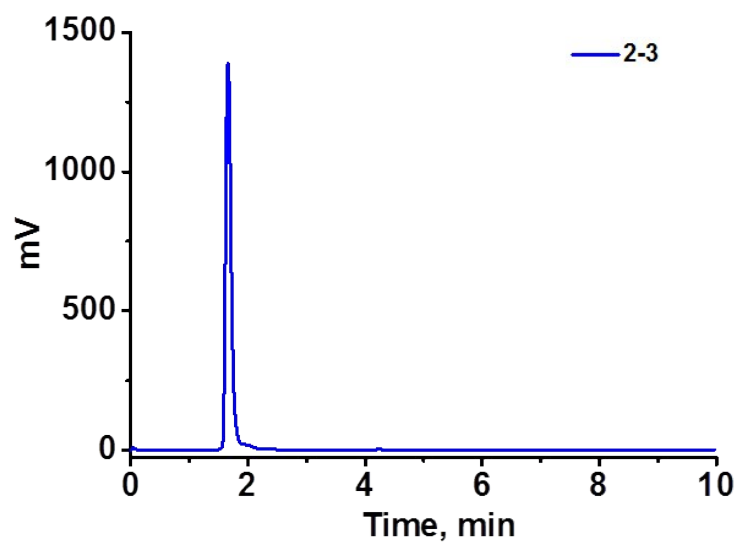

**Fig. S26** HPLC of intermediate **2-3** in ethyl acetate (EA) solvent. (Retention time of peak = 1.65 min).

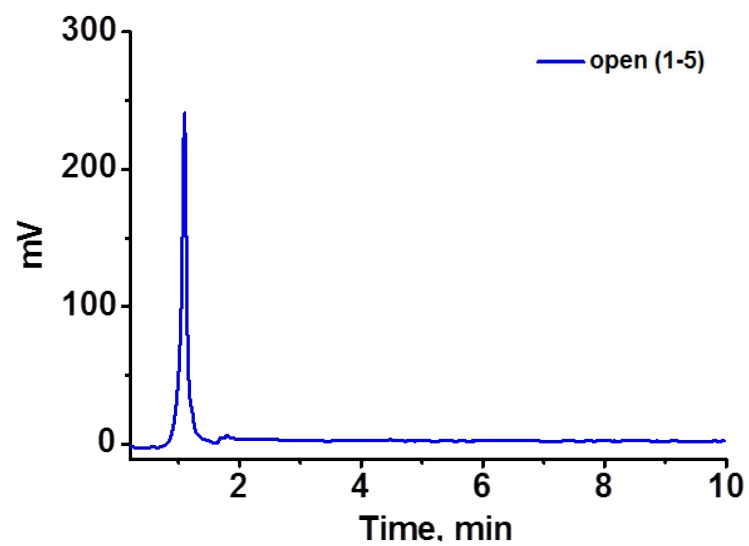

**Fig. S27** HPLC of intermediate **1-5** in ethyl acetate (EA) solvent. (Retention time of peak = 1.09 min).

## SAMPLE INFORMATION

Sample Name: Unk  
Sample Type: Broad Unknown  
Vial: 1  
Injection #: 1  
Injection Volume: 200.00  $\mu$ l  
Run Time: 30.00 Minutes

Acquired By: System  
Date Acquired: 2015/7/10 10:42:57  
Acq. Method: THF\_40\_1  
Date Processed: 2015/7/10 11:26:40  
Channel Name: 410  
Sample Set Name: 20150710\_min

## Autoscaled Chromatogram

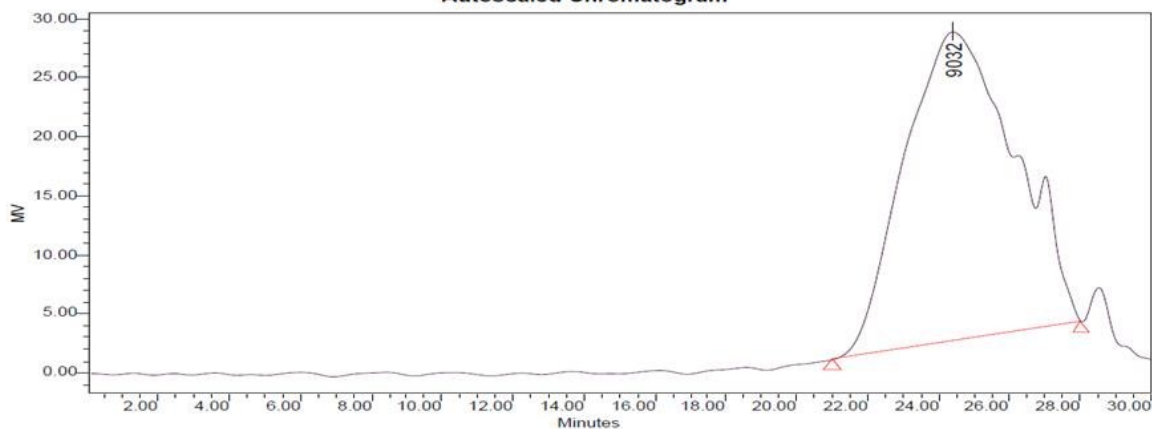

## GPC Results

| Dist Name | Elution Volume (ml) | Retention Time (min) | Adjusted RT (min) | Mn   | Mw    | MP   | Mz    | Mz+1  | Mz/Mw    | Mz+1/Mw  |
|-----------|---------------------|----------------------|-------------------|------|-------|------|-------|-------|----------|----------|
| 1         | 24.373              | 24.373               | 24.373            | 7489 | 11634 | 9032 | 17858 | 24751 | 1.534973 | 2.127512 |

## GPC Results

| Area (sec) | % Area | Height ( ) | % Height | Integration Type | Peak Codes | Points Across Peak | Start Time (min) | End Time (min) | Baseline Start (min) |
|------------|--------|------------|----------|------------------|------------|--------------------|------------------|----------------|----------------------|
| 5688572    | 100.00 | 26213      | 100.00   | bb               |            | 420                | 21.000           | 28.000         | 21.000               |

## GPC Results

| Baseline End (min) | Slope ( /sec) | Offset ( )     |
|--------------------|---------------|----------------|
| 1 28.000           | 4.613982e-001 | -8.495745e+000 |

Fig. S28 GPC data of P-PHT.
